# Supplementary material for: O2 plasma-activated CuO-ZnO inverse opals as high-performance methanol microreformer
Source: Royal Society of Chemistry journal article supplement (doi:10.1039/c0jm02605k), 2010-01-01
Supplement: c0jm02605k.pdf [file c0jm02605k.pdf]

## Supporting Information

### **O<sub>2</sub> Plasma-activated CuO-ZnO Inverse Opals as High-performance Methanol Microreformer**

Yan-Gu Lin,<sup>a</sup> Yu-Kuei Hsu,<sup>b</sup> San-Yuan Chen,<sup>a</sup> Li-Chyong Chen,<sup>\*c</sup> and Kuei-Hsien  
Chen<sup>b,c</sup>

<sup>a</sup> Yan-Gu Lin and Prof. San-Yuan Chen

Department of Materials Science and Engineering, National Chiao Tung University, Hsinchu  
30010, Taiwan

<sup>b</sup> Dr. Yu-Kuei Hsu and Dr. Kuei-Hsien Chen

Institute of Atomic and Molecular Sciences, Academia Sinica, Taipei 10617, Taiwan

<sup>c</sup> Dr. Li-Chyong Chen and Dr. Kuei-Hsien Chen

Center for Condensed Matter Sciences, National Taiwan University, Taipei 10617, Taiwan

[\*] Dr. Li-Chyong Chen

Tel: (+886) 2-33665249

Fax: (+886) 2-23655404

E-mail: chenlc@ntu.edu.tw

## EXPERIMENTAL SECTION

For synthesis of CuO-ZnO catalysts with non-inverse opal nanostructure, the starting solution of copper-zinc was prepared by mixing 0.5 M  $\text{Cu}(\text{NO}_3)_2 \cdot 3\text{H}_2\text{O}$  (99.5%, Aldrich) and 0.5 M  $\text{Zn}(\text{NO}_3)_2 \cdot 6\text{H}_2\text{O}$  (98%, Aldrich) in ethanol. This solution was then applied dropwise to the inner surface of the microchannels. Infiltrated samples were then placed in air at room temperature for 2-4 h. Finally, the resulting CuZnO composites were heated in air to 300 °C to obtain the CuO-ZnO catalysts with random microstructure.

For synthesis of  $\text{O}_2$ -plasma CuO-ZnO inverse opals, 10 wt % of polystyrene (PS) colloidal suspension (Microparticles GmbH, 500 nm) was introduced into the microchannels. After room temperature evaporation of water from the suspension, PS opals with well-defined structures were formed inside the microchannels. These PS particle-packed microchannels were heated at 90 °C for 3-6 h in order to improve the connectivity between the neighboring particles. The copper-zinc precursor solution containing 0.5 M  $\text{Cu}(\text{NO}_3)_2 \cdot 3\text{H}_2\text{O}$  (99.5%, Aldrich) and 0.5 M  $\text{Zn}(\text{NO}_3)_2 \cdot 6\text{H}_2\text{O}$  (98%, Aldrich) in ethanol was then applied dropwise over the surface of the PS layer. These infiltrated samples were then placed in air at room temperature for 2-4 h. Finally, the resulting CuZnO/PS composites were heated in air to 300 °C to obtain the CuO-ZnO inverse opals. These pristine CuO-ZnO inverse opals were then exposed to  $\text{O}_2$  plasma for a short duration of 3-15 min to obtain  $\text{O}_2$ -plasma treated CuO-ZnO inverse opals. The process of plasma-chemical surface modification was performed in a parallel-plate reactor with a DC flowing discharge (PCD-150; ALL

*J. Mater. Chem.*

REAL TECHNOLOGY CO., Ltd.; Taiwan). The distance between ground electrode and powered electrode was about 6 cm. The plasma chamber was 250 mm in diameter and 140 mm in height. The electrode was in the form of disk with around 6 inch in size. For the O<sub>2</sub> plasma treatment, the substrate temperature, total gas pressure and DC power were maintained at room temperature, 200 mTorr and 50 W, respectively.

For microstructural investigations, XRD analyses were performed using a Bruker D8 Advance diffractometer with Cu (40 kV, 40 mA) radiation. SEM images were obtained on a JEOL 6700 filed-emission SEM. XPS analyses were carried out using a Microlab 350 system. For TEM (JEOL JEM-2100) observation, the products formed on the CuO-ZnO inverse opal/microchannel substrate were scratched and dispersed on a carbon-coated Cu grid. Micro-Raman analyses were performed on a Jobin Yvon Labram HR800 spectrometer. BET measurements were carried out using a Micrometry Tristar instrument. The catalytic performance tests were conducted using an integrated microchannel-reactor under atmospheric pressure. The Al-alloy (6061) chip of the microreactor was fabricated in-house with laser machining. Ten microchannels per Al-alloy chip were separated by 800  $\mu\text{m}$  fins; with width, depth and length of 500 $\mu\text{m}$ , 200 $\mu\text{m}$  and 4.3 cm, respectively. For the calculation of the catalyst weight for MRR, we measure the total weight including CuO-ZnO inverse opal by precision electronic balance ( $\pm 0.1$  mg; Sartorius). The commercial CuO-ZnO-Al<sub>2</sub>O<sub>3</sub> catalysts (Sud-Chemie; MDC-3) were used as reference sample, which were deposited on the inner surface of microchannels using the wash-coated method. After reduction of

*J. Mater. Chem.*

CuO-ZnO inverse opals in a H<sub>2</sub>/N<sub>2</sub> (5/95), flown at the rate of 50 mL min<sup>-1</sup> at 200 °C for 1 hr, premixed water, oxygen and methanol with a H<sub>2</sub>O/O<sub>2</sub>/MeOH molar ratio of 1/0.125/1 were fed into the preheater maintained at 200 °C by means of microfeeder. The feed and product gas streams were analyzed inline using a thermal-conductivity-detector gas chromatograph (TCD-GC; China Chromatography CO., LTD.) and CO detector (Gastech CO., Ltd.; GTF200).

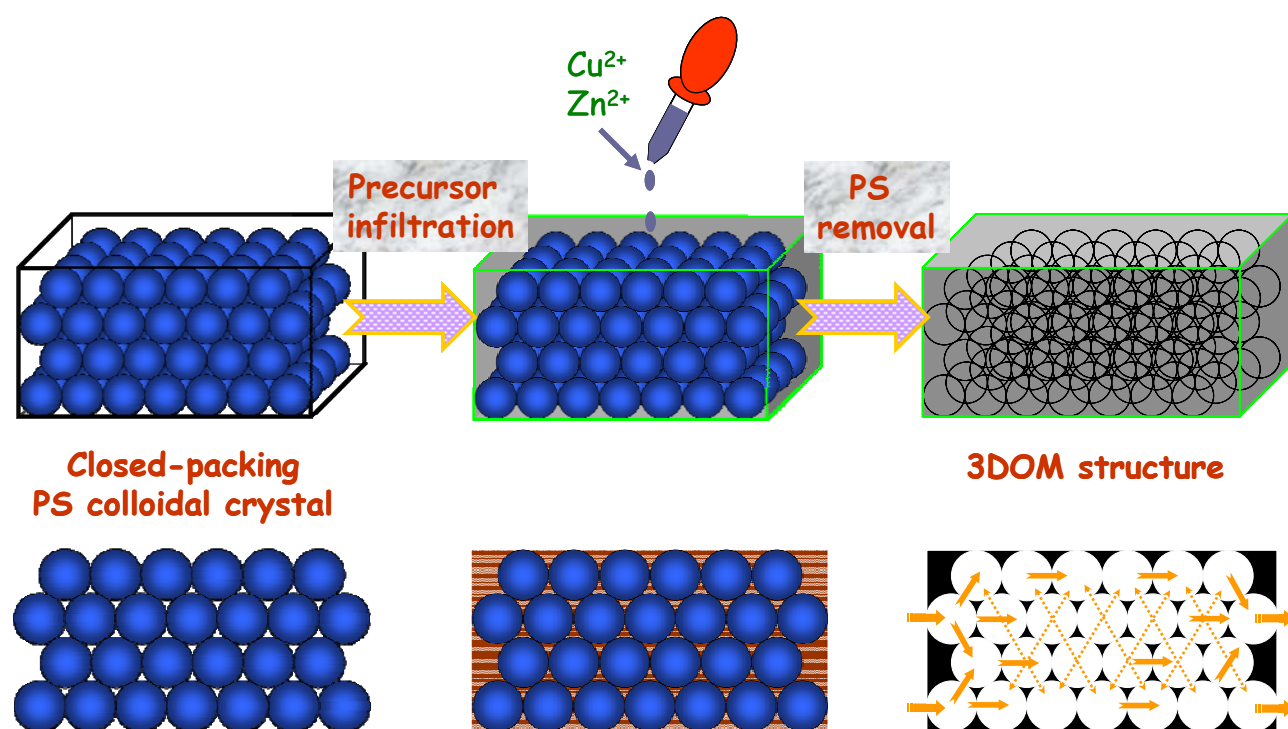

Fig. S1 Procedure for the preparation of CuO-ZnO inverse opals using polystyrene colloidal crystal templates.

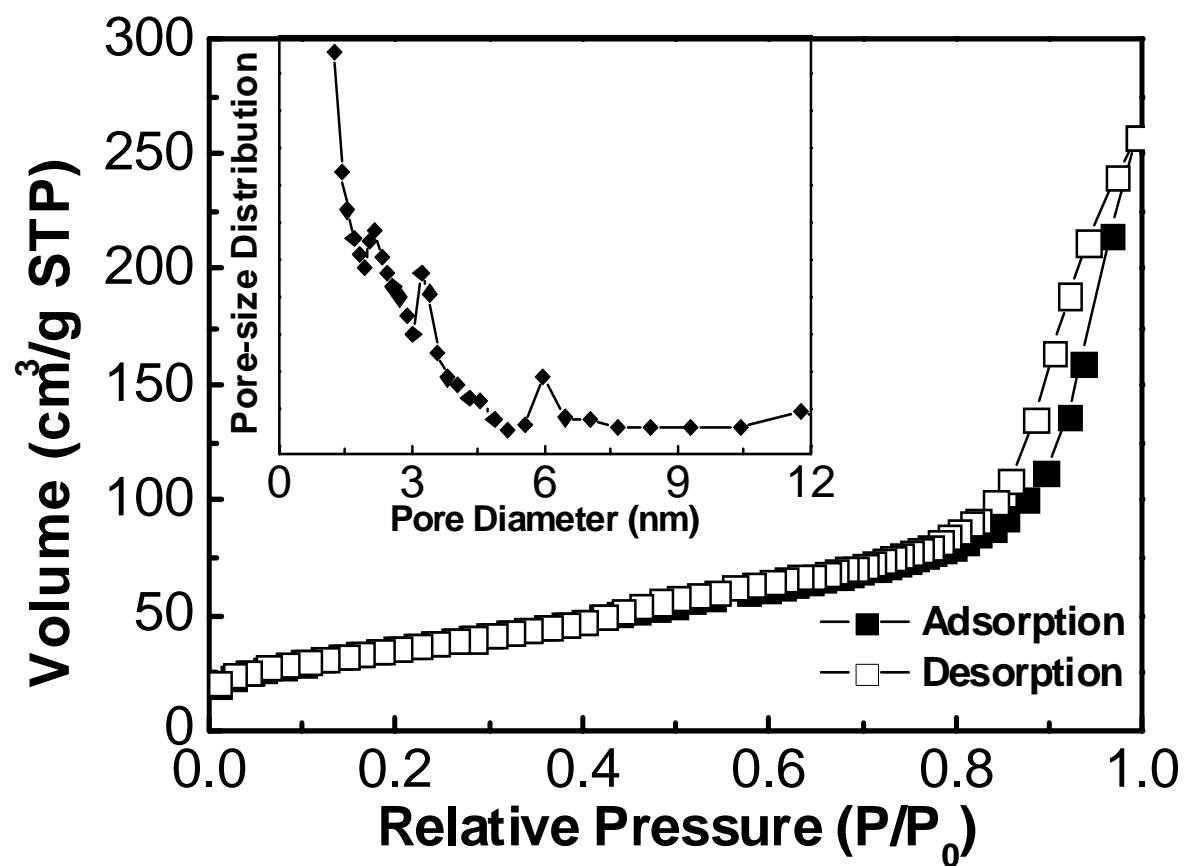

Fig. S2 N<sub>2</sub> adsorption-desorption isotherm and pore-size distribution (inset) of CuO-ZnO inverse opals without O<sub>2</sub>-plasma treatment.

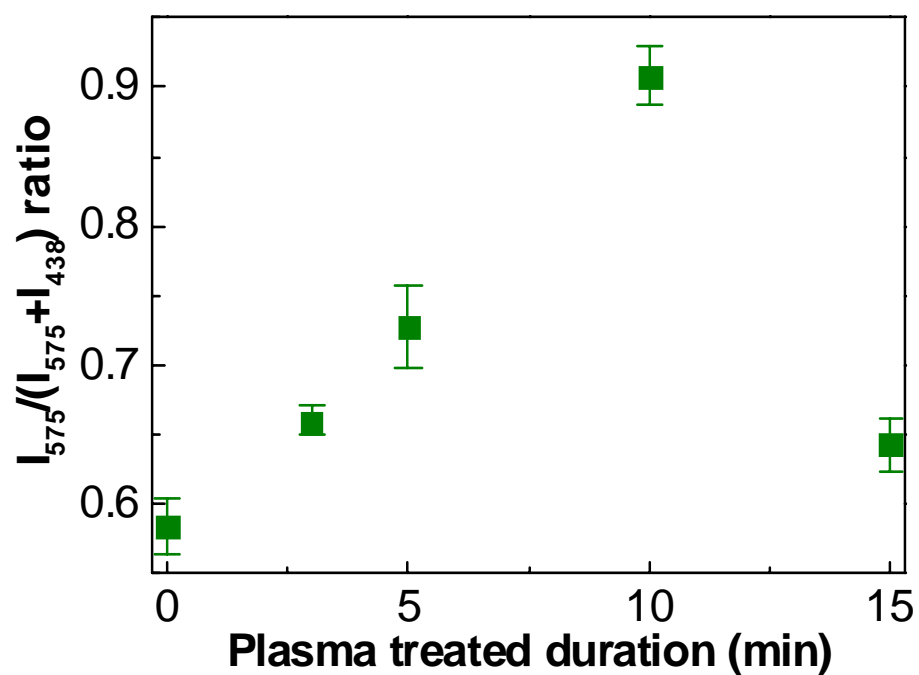

Fig. S3 Relative ratio of the integrated 575 cm<sup>-1</sup> peak intensity to the sum of the 438 and 575 cm<sup>-1</sup> peaks as a function of O<sub>2</sub>-plasma exposure time for CuO-ZnO inverse opals.

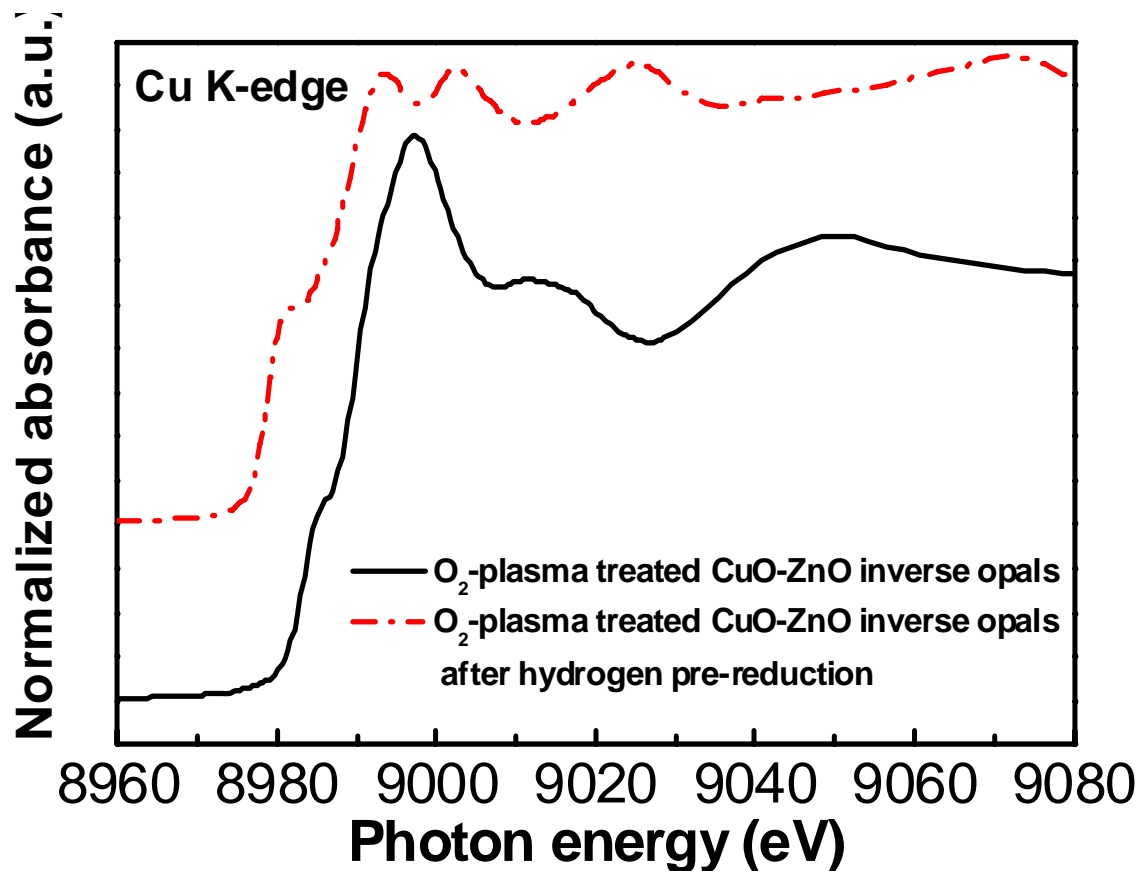

Fig. S4 Cu K-edge X-ray absorption near-edge spectroscopy (XANES) of O<sub>2</sub>-plasma treated CuO-ZnO inverse opals and O<sub>2</sub>-plasma treated CuO-ZnO inverse opals after H<sub>2</sub> reduction. From XANES analysis, after H<sub>2</sub> reduction of O<sub>2</sub>-plasma treated CuO-ZnO inverse opals, all the CuO will turn to metallic Cu.



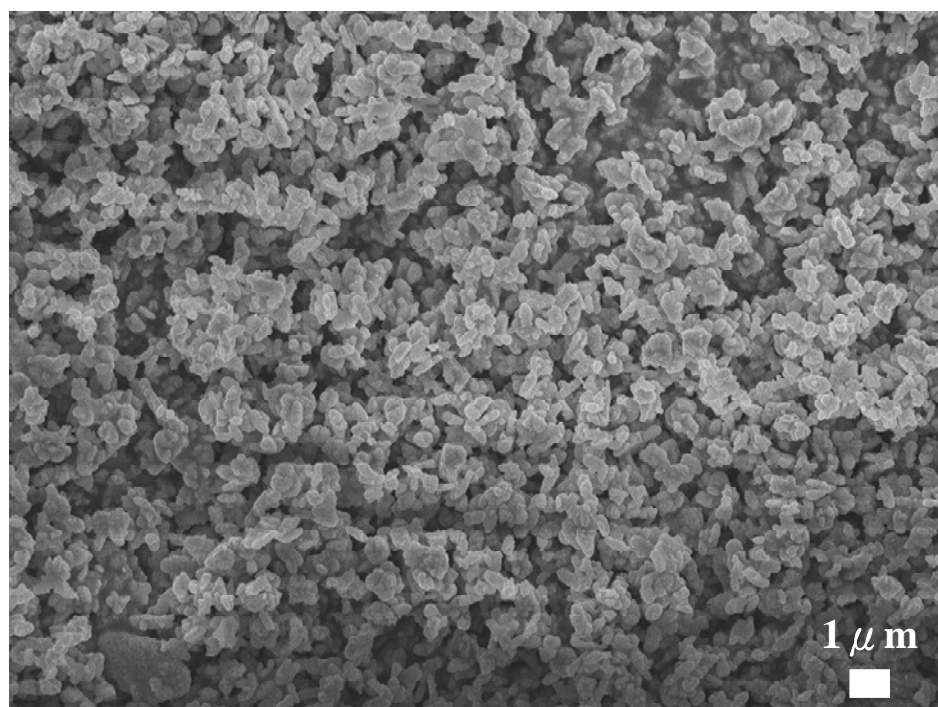

Fig. S5 SEM image of Cu-ZnO catalysts with non-inverse opal nanostructure.
